# Supplementary material for: A mitochondria-targeted fluorescent probe for ratiometric detection of endogenous sulfur dioxide derivatives in cancer cells
Source: Royal Society of Chemistry journal article supplement (doi:10.1039/c5cc09092j), 2016-01-01
Supplement: c5cc09092j1.pdf [file c5cc09092j1.pdf]

## Supporting Information

### **A mitochondria-targeted fluorescent probe for ratiometric detection of endogenous sulfur dioxide derivatives in cancer cells**

Dong-Peng Li<sup>a</sup>, Zhao-Yang Wang<sup>b</sup>, Xiang-Jian Cao<sup>a</sup>, Jie Cui<sup>a</sup>, Xin Wang<sup>a</sup>, Hao-Zhong Cui<sup>a</sup>, Jun-Ying Miao<sup>b\*</sup>,  
Bao-Xiang Zhao<sup>a\*</sup>

<sup>a</sup> *Institute of Organic Chemistry, School of Chemistry and Chemical Engineering, Shandong University, Jinan 250100, P.R. China. E-mail: [bxzhao@sdu.edu.cn](mailto:bxzhao@sdu.edu.cn) (B.X. Zhao); Tel.: +86 531 88366425; fax: +86 531 88564464;*

<sup>b</sup> *Institute of Developmental Biology, School of Life Science, Shandong University, Jinan 250100, P.R. China. E-mail: [miaojy@sdu.edu.cn](mailto:miaojy@sdu.edu.cn) (J.Y. Miao)*

## Apparatus and chemicals

$^1\text{H}$  NMR (300 MHz) and  $^{13}\text{C}$  NMR (75 MHz) spectra were recorded on a Bruker Avance 300 spectrometer using  $\text{CDCl}_3$ ,  $\text{D}_2\text{O}$  or  $\text{DMSO}-d_6$  as solvent and tetramethylsilane (TMS) as an internal standard. HR-MS spectra were recorded on a Q-TOF6510 spectrograph (Agilent). IR spectra were recorded by use of the IR spectrophotometer VERTEX 70 FT-IR (Bruker Optics). Melting points were measured on an XD-4 digital micro-melting point apparatus. Thin-layer chromatography (TLC) was conducted on silica gel 60  $\text{F}_{254}$  plates (Merck KGaA) and column chromatography was conducted over silica gel (mesh 200-300). Fluorescence measurements were recorded on a Perkin-Elmer LS-55 luminescence spectrophotometer, and UV-vis spectra were recorded on a U-4100 UV-Vis-NIR Spectrometer (Hitachi). Quartz cuvettes with a 1 cm path length and 3-mL volume were involved in fluorescence and UV-vis spectra measurements. The pH was measured by use of a PHS-3C digital pH-meter (YouKe, Shanghai). All reagents were purchased from J&K, Aladdin and Sinopharm Chemical Reagent Co. and used without further purification.

## Preparation for UV-vis and fluorescence spectral measurements

Phosphate buffered saline (PBS, 10 mM) was used throughout the absorption and fluorescence determination. Probe HCy-D was dissolved in *N,N*-dimethylformamide (DMF) to get the stock solution ( $1 \times 10^{-3}$  M). Twice-distilled water was used to prepare stock solution ( $1 \times 10^{-3}$  M) of NaF, NaCl, NaBr, KI,  $\text{NaHCO}_3$ ,  $\text{KNO}_3$ , NaClO,  $\text{Na}_2\text{SO}_4$ , KSCN,  $\text{Na}_2\text{S}_2\text{O}_3$ ,  $\text{Na}_2\text{S}$ ,  $\text{Na}_2\text{SO}_3$ ,  $\text{NaHSO}_3$ , cysteine, homocysteine and glutathione. Stock solution of  $\text{NaHSO}_3$  and  $\text{Na}_2\text{SO}_3$  was freshly prepared each time before use. Test solution was prepared by placing 50  $\mu\text{L}$  of the stock solution and an appropriate aliquot of each testing species solution into a 10-mL volumetric flask, and the solution was diluted to 10 mL with PBS buffer (10 mM, pH 7.4) containing 30% DMF (v/v).

## Calculation of energy transfer efficiency

Energy transfer efficiency ( $E$ ) was calculated using the following equation:

$$E = 1 - F_{DA}/F_D$$

Where,  $F_{DA}$  and  $F_D$  denote the donor fluorescence intensity with and without an acceptor, respectively.

## 2.5. Theoretical calculations

All the calculations were implemented with the Gaussian09 program package. The initial geometries of the compounds were generated by the Gauss View software. The ground state structures of Donor, Acceptor and Compound A were optimized using the density functional theory (DFT). The excited state related calculations (UV-vis absorption and fluorescence emission) were carried out with the time-dependent DFT (TD-DFT) with the optimized structures of the ground. The solvent effects were modeled with the polarizable continuum model (PCM).

## Photostability study and cell imaging

Hela cells were cultured in a 6-well plate in Dulbecco's modified Eagle's medium (DMEM) supplemented with 10% fetal bovine serum in an atmosphere of 5%  $\text{CO}_2$  and 95% air at  $37^\circ\text{C}$ . The probe HCy-D was dissolved in DMSO to get the stock solution (10 mM) and diluted to 1  $\mu\text{M}$  before use. Hela cells were incubated with 1.0  $\mu\text{M}$  HCy-D for 1 h and then treated with 0.05, 0.1, 0.5 or 1 mM  $\text{NaHSO}_3$  for 0.5 h. Subsequently, excited at 405 nm, the

cells were imaged under a confocal microscope (LSM 700) and the images were collected at emission channels of 405-555 nm (green channel) and 560-700 nm (red channel), respectively.

### **Cell imaging of HepG2 cells and L-02 cells**

HepG2 cells or L-02 cells were cultured in a 6-well plate in Dulbecco's modified Eagle's medium (DMEM) supplemented with 10% fetal bovine serum in an atmosphere of 5% CO<sub>2</sub> and 95% air at 37°C. The probe HCy-D was dissolved in DMSO to get the stock solution (10 mM) and diluted to 1 µM before use. HepG2 cells or L-02 cells were incubated with 1.0 µM HCy-D for 1 h and then treated with a mixture of 500 µM GSH and 250 µM Na<sub>2</sub>S<sub>2</sub>O<sub>3</sub> for 0.5 h. For control experiments, HCy-D loaded HepG2 cells were pretreated with 10 mM TNBS for 0.5 h, and then treated with a mixture of 500 µM GSH and 250 µM Na<sub>2</sub>S<sub>2</sub>O<sub>3</sub> for another 0.5 h. Simultaneously, HCy-D loaded HepG2 cells were treated with 500 µM GSH only for 0.5h. Subsequently, excited at 405 nm, the cells were imaged under a confocal microscope (LSM 700) and the images were collected at emission channels of 405-555 nm (green channel) and 560-700 nm (red channel), respectively.

### **Colocalization imaging of cells**

Hela cells were incubated with 1 µM HCy-D for 1 h at 37°C. Then, 1 µM Mito Tracker Deep Red was added and incubated for another 0.5 h and the confocal fluorescence images were captured.

### **Cytotoxicity Assay**

HeLa Cells were cultured in DMEM supplemented with 10% FBS in an atmosphere of 5% CO<sub>2</sub> and 95% air at 37°C. The cells were placed in a 96-well plate, followed by addition of probe HCy-D with final concentrations of 1, 5, 10 µM, respectively. The cells were then incubated for 6 h, followed by SRB assays.

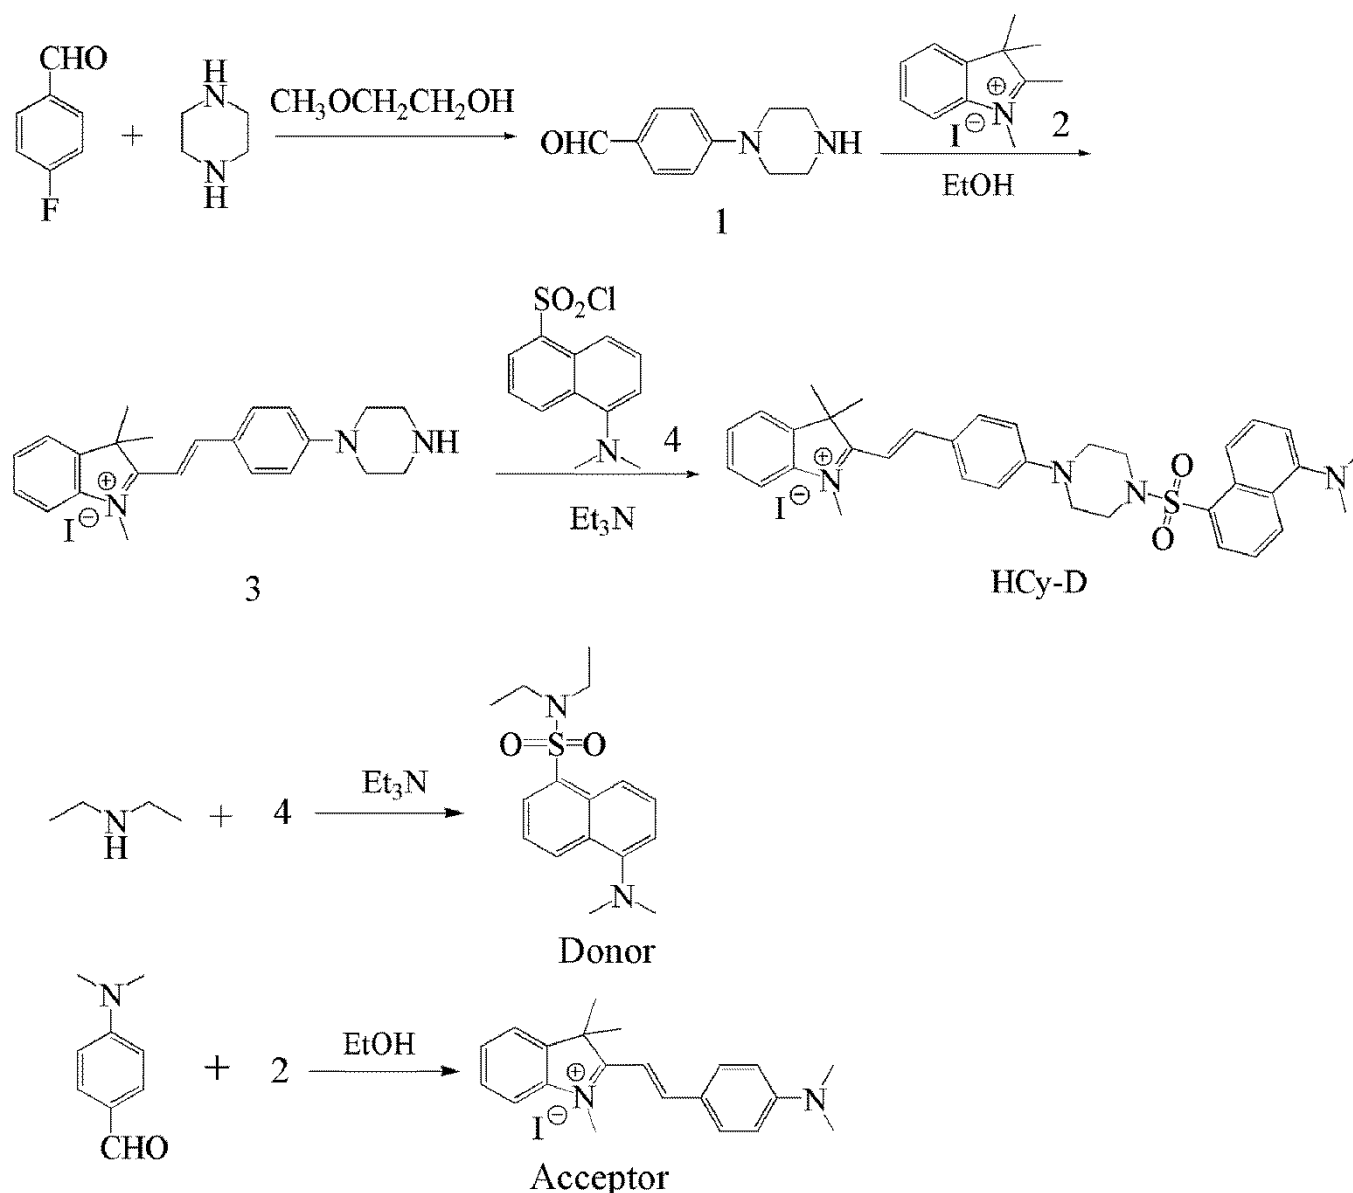

Scheme S1 Synthesis procedures of HCy-D, Donor and Acceptor.

### Synthesis of compound 1

4-Fluorobenzaldehyde (0.57 g, 4.64 mmol) (dissolved in 5 mL 2-methoxyethanol) was added dropwise to piperazine (1.46 g, 17.4 mmol) dissolved in a mixture of  $\text{H}_2\text{O}$  (18 mL) and 2-methoxyethanol (25 mL) in 0.5 h. The mixture was then refluxed for 3 h. Yellow solid precipitated out at room temperature, and was washed thoroughly with water (100 mL). The solid was dissolved in 50 mL 10% hydrochloric acid and filtered to remove the residue, then 20% sodium hydroxide was added to the filtrate until the solution pH was about 10. The mixture was extracted with dichloromethane ( $\text{CH}_2\text{Cl}_2$ , 50 mL  $\times$  2) and the organic layer was separated, washed with brine (50 mL), dried over anhydrous sodium sulfate and concentrated under reduced pressure to afford a pale yellow solid (0.64g, 65.9%). Mp: 179-180°C.

### Synthesis of compound 3

To a mixture of compound 1 (0.19 g, 1 mmol) and compound 2 (0.3 g, 1 mmol) was added 10 mL absolute ethanol. The mixture was reflux under  $\text{N}_2$  atmosphere for 3.5 h, after which the solvent was removed under reduced

pressure to afford a deep red solid (0.4 g, 90%) without further purification.

### Synthesis of HCy-D

To a mixture of compound 3 (0.32 g, 0.67 mmol) and 0.2 mL distilled Et<sub>3</sub>N in 5 mL distilled CH<sub>2</sub>Cl<sub>2</sub> at 0°C, compound 4 (0.27 g, 1 mmol) dissolved in 3 mL distilled CH<sub>2</sub>Cl<sub>2</sub> was added dropwise over a period of 15 min. Then the mixture was stirred at room temperature until compound 3 was consumed (about 3 h). Then 10 mL water was added to the reaction mixture. The organic layer was separated and washed twice with water (20 mL × 2), dried over anhydrous sodium sulfate and concentrated under reduced pressure. The residue was subjected to column chromatography on silica gel (CH<sub>2</sub>Cl<sub>2</sub> : MeOH = 20 : 1) to afford a red solid (0.37 g, 75%). Mp: >300°C. <sup>1</sup>H NMR (DMSO-*d*<sub>6</sub>, 300 MHz) δ 8.55 (d, *J* = 8.4 Hz, 1H), 8.36 (d, *J* = 8.7 Hz, 1H), 8.28 (d, *J* = 15.9 Hz, 1H), 8.19 (dd, *J* = 7.5 Hz, 0.8 Hz, 1H), 8.06 (d, *J* = 9.0 Hz, 2H), 7.81-7.49 (m, 6H), 7.35 (d, *J* = 15.9 Hz, 2H), 7.28 (t, *J* = 7.5 Hz, 1H), 7.05 (d, *J* = 9.3 Hz, 2H), 4.02 (s, 3H), 3.58 (t, *J* = 2.4 Hz, 4H), 3.25 (t, *J* = 2.4 Hz, 4H), 2.83 (s, 6H), 1.74 (s, 6H); <sup>13</sup>C NMR (DMSO-*d*<sub>6</sub>, 75 MHz) δ 180.95, 154.10, 154.02, 151.95, 143.34, 142.41, 133.97, 132.74, 130.99, 130.69, 130.17, 129.70, 129.22, 128.82, 128.61, 124.62, 124.21, 123.13, 119.32, 115.83, 114.57, 114.43, 107.80, 51.74, 46.53, 46.26, 45.53, 34.05, 26.42; IR (KBr, cm<sup>-1</sup>): 3465, 2921, 2856, 1634, 1576, 1526, 1451, 1384, 1299, 1240, 1192, 1113, 945, 620; HR-MS (ESI): *m/z* calculated for C<sub>35</sub>H<sub>39</sub>N<sub>4</sub>O<sub>2</sub>S<sup>+</sup> 579.2794, found 579.2698.

### Synthesis of Donor

To a mixture of NHEt<sub>2</sub> (0.146 g, 2 mmol) and 0.14 mL distilled Et<sub>3</sub>N in 5 mL distilled CH<sub>2</sub>Cl<sub>2</sub> at 0°C, compound 4 (0.27 g, 1 mmol) dissolved in 10 mL distilled CH<sub>2</sub>Cl<sub>2</sub> was added dropwise over a period of 30 min. Then the mixture was stirred at room temperature for 1 h, after which the mixture was washed twice with water (50 × 2 mL). The organic layer was separated, dried over anhydrous sodium sulfate and concentrated under reduced pressure. The residue was subjected to column chromatography on silica gel (petroleum ether : ethyl acetate = 5 : 1) to afford a greenish yellow solid (0.33 g, 95%). Mp: 106-107°C. <sup>1</sup>H NMR (DMSO-*d*<sub>6</sub>, 300 MHz) δ 8.54 (d, *J* = 8.7 Hz, 1H), 8.31 (d, *J* = 9.0 Hz, 1H), 8.18 (d, *J* = 7.5 Hz, 1H), 7.52 (q, *J* = 7.5 Hz, 2H), 7.18 (d, *J* = 7.2 Hz, 1H), 3.41-3.34 (q, *J* = 7.2 Hz, 4H), 2.89 (s, 6H), 1.12 (t, *J* = 7.2 Hz, 6H); <sup>13</sup>C NMR (DMSO-*d*<sub>6</sub>, 75 MHz) δ 135.69, 130.16, 130.04, 129.43, 127.81, 123.16, 119.81, 115.15, 45.46, 40.92, 13.77; HR-MS (ESI): *m/z* calculated for C<sub>16</sub>H<sub>22</sub>N<sub>2</sub>O<sub>2</sub>S<sup>+</sup> 306.1402, found 306.1422.

### Synthesis of Acceptor

4-Dimethylaminobenzaldehyde (0.112 g, 0.75 mmol), compound 2 (0.15 g, 0.5 mmol) were mixed and dissolved in ethanol (10 mL). Then the mixture was refluxed for 4.5 h under nitrogen atmosphere. The solvent was then evaporated under reduced pressure, and the resulting residue was purified by flash column chromatography (DCM : MeOH = 20:1, V/V) to afford the product (0.194 g, 92%). Mp: 175-177°C. <sup>1</sup>H NMR (300 MHz, DMSO-*d*<sub>6</sub>) δ 8.31 (d, *J* = 15.9 Hz, 1H), 8.07 (d, *J* = 9.0 Hz, 2H), 7.77 (d, *J* = 7.8 Hz, 1H), 7.70 (d, *J* = 7.8 Hz, 1H), 7.58-7.45 (m, 2H), 7.26 (d, *J* = 15.9 Hz, 1H), 6.89 (d, *J* = 9 Hz, 2H), 3.97 (s, 3H), 3.16 (s, 6H), 1.75 (s, 6H); <sup>13</sup>C NMR (100 MHz, DMSO-*d*<sub>6</sub>): 206.93, 180.06, 154.90, 154.52, 143.02, 142.54, 129.15, 128.00, 123.08, 122.74, 114.04, 112.65, 105.66, 51.33, 33.57, 31.17, 26.71; HR-MS (ESI): *m/z* calculated for C<sub>21</sub>H<sub>25</sub>N<sub>2</sub><sup>+</sup>: 305.2018, found: 305.2059.

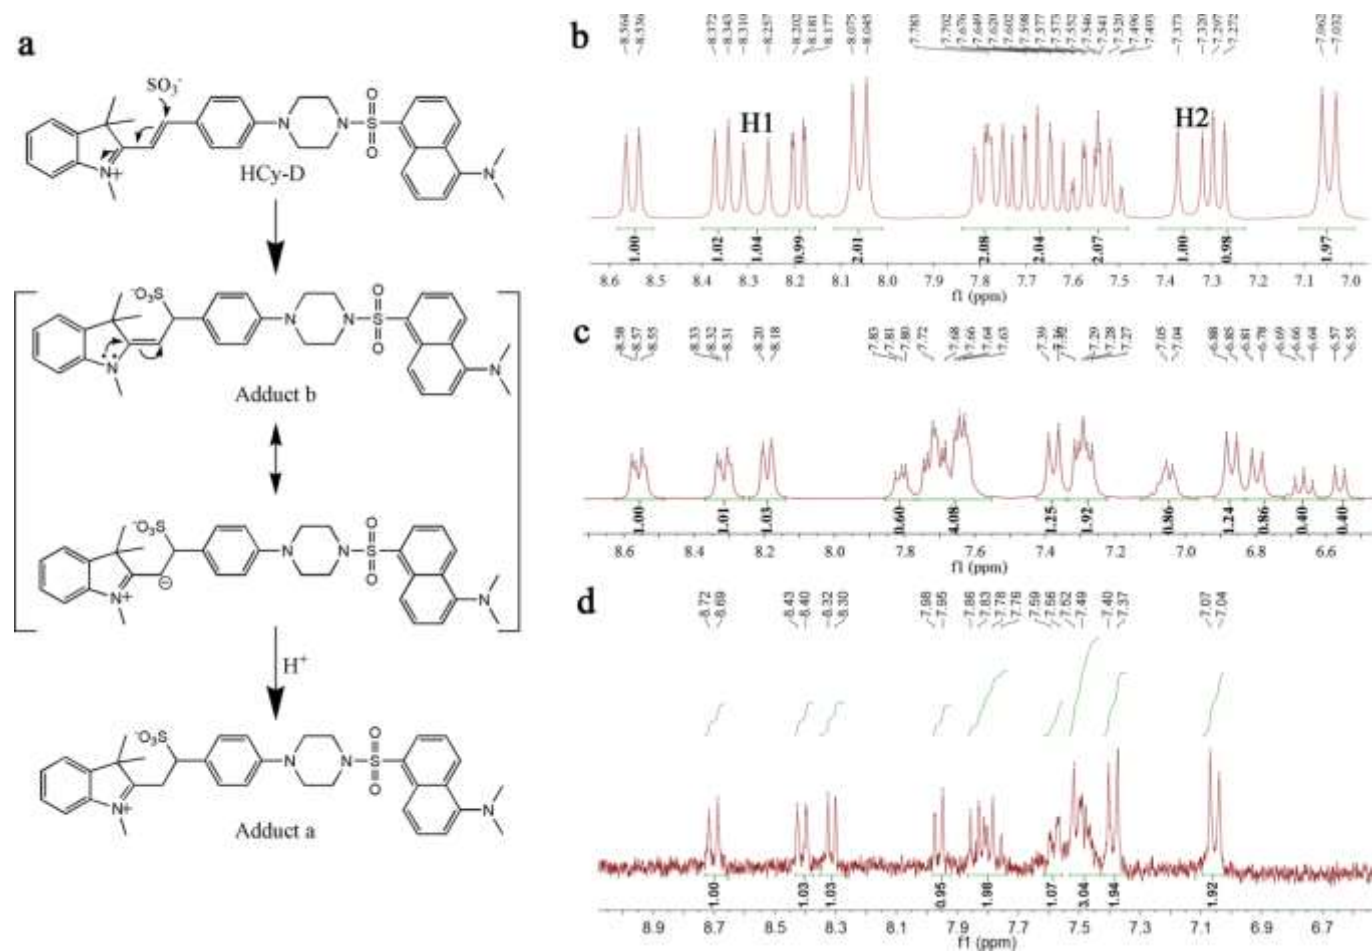

Scheme S2 (a) The proposed reaction mechanism of probe HCy-D with  $\text{SO}_2$  derivatives. (b) Partial  $^1\text{H}$  NMR spectra of HCy-D in  $\text{DMSO}-d_6$ . (c) Partial  $^1\text{H}$  NMR spectra of HCy-D in the presence of  $\text{NaHSO}_3$  in  $\text{DMSO}-d_6:\text{D}_2\text{O} = 4:1$ . (d) Partial  $^1\text{H}$  NMR spectra of HCy-D in the presence of  $\text{NaHSO}_3$  in  $\text{DMSO}-d_6:\text{D}_2\text{O} = 1:4$ .

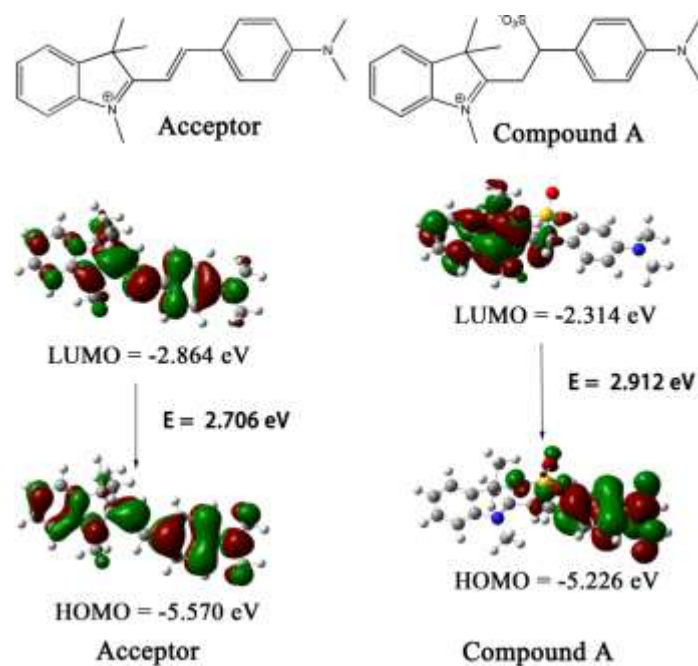

Scheme S3 Frontier molecular orbital plots of the Acceptor and Compound A in water (PCM model) involved in the

vertical excitation. Green and red shapes are corresponding to the different phases of the molecular wave functions for HOMO and LUMO orbitals.

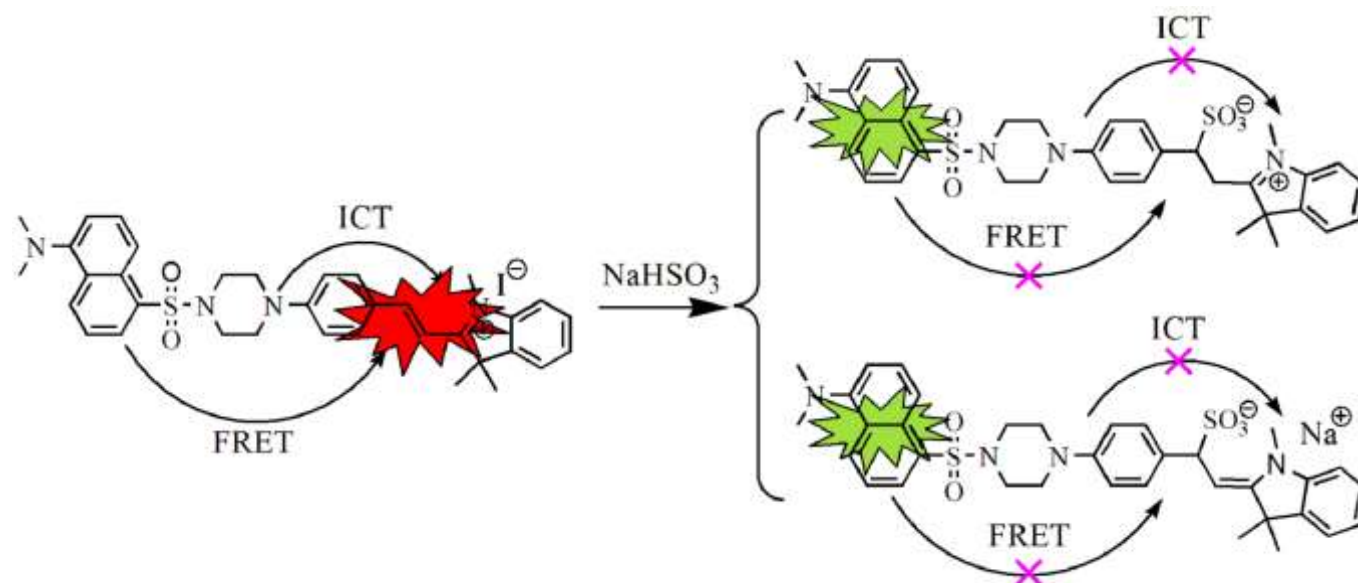

Scheme S4 The inhibition of FRET-ICT process by addition of bisulfite.

Table S1. Comparison of ratiometric fluorescent probes for  $\text{HSO}_3^-/\text{SO}_3^{2-}$ .

| Probe structures | $\lambda_{\text{ex}}/\text{nm}$ <sup>[a]</sup> | $\lambda_{\text{em}}/\text{nm}$ <sup>[a]</sup> | Response time | Interaction Mechanisms <sup>[b]</sup> | Cell imaging               | Ref. |
|------------------|------------------------------------------------|------------------------------------------------|---------------|---------------------------------------|----------------------------|------|
|                  | 466/580                                        | 523/663                                        | 90 s          | ICT                                   | U-2OS                      | 5o   |
|                  | 446                                            | 480/578                                        | 30 s          | ICT                                   | --                         | 5g   |
|                  | 445                                            | 478/633                                        | 5 min         | ICT                                   | HeLa                       | 5f   |
|                  | 405                                            | 480/650                                        | 3 min         | ICT                                   | Mitochondria in HeLa cells | 5l   |

|                                                                                     |         |         |                            |          |                                                  |              |
|-------------------------------------------------------------------------------------|---------|---------|----------------------------|----------|--------------------------------------------------|--------------|
| 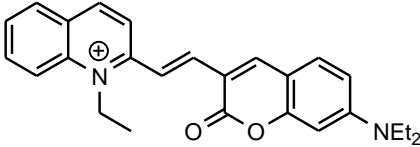   | 450     | 518/610 | 15 min                     | ICT      | RAW 264.7<br>macrophage                          | 5i           |
|    | 450/550 | 485/667 | --                         | ICT      | HeLa                                             | 5m           |
|    | 415/500 | 460/600 | --                         | ICT      | MCF-7                                            | 5h           |
|   | 430/605 | 485/640 | 5 min                      | PET      | HepG2                                            | 5s           |
|  | 415     | 485/605 | 60 min                     | ICT      | A549                                             | 5p           |
|  | 410     | 465/592 | $t_{1/2} \approx 5$<br>min | ICT      | --                                               | 5q           |
|  | 322/470 | 460/595 | 3 min                      | TICT     | A549                                             | 5t           |
|  | 410 nm  | 530/580 | 2 min                      | FRET-ICT | Mitochondria in<br>HeLa cells;<br>HepG2;<br>L-02 | This<br>work |



[a] “/” indicates two excitation wavelengths or two emission wavelengths for one probe. [b] FRET: Förster resonance energy transfer; PET: Photo-induced electron transfer; ICT: Intramolecular charge transfer; TICT: Twisted intramolecular charge transfer.

Table S2 Selected parameters for the vertical excitation (UV-vis absorbance) of Acceptor and Compound A based on the optimized ground state geometries.

| Compound   | Electronic Transitions           | Excitation Energy (eV) <sup>a</sup> | $f^b$  | Composition    | Cl <sup>c</sup> |
|------------|----------------------------------|-------------------------------------|--------|----------------|-----------------|
| Acceptor   | S <sub>0</sub> to S <sub>1</sub> | 2.6279 (471.81 nm)                  | 1.5445 | HOMO to LUMO   | 0.70619         |
| Compound A | S <sub>0</sub> to S <sub>1</sub> | 3.8308 (323.65 nm)                  | 0.3229 | HOMO-2 to LUMO | 0.63202         |
|            | S <sub>0</sub> to S <sub>2</sub> | 4.0416 (306.77 nm)                  | 0.2267 | HOMO to LUMO+1 | 0.56554         |

<sup>a</sup> Electronic excitation energies (eV), the numbers in parentheses are the excitation energy in wavelength. <sup>b</sup> Oscillator strength. <sup>c</sup> Coefficient of the wave function for each excitation. The Cl coefficients are in absolute values.

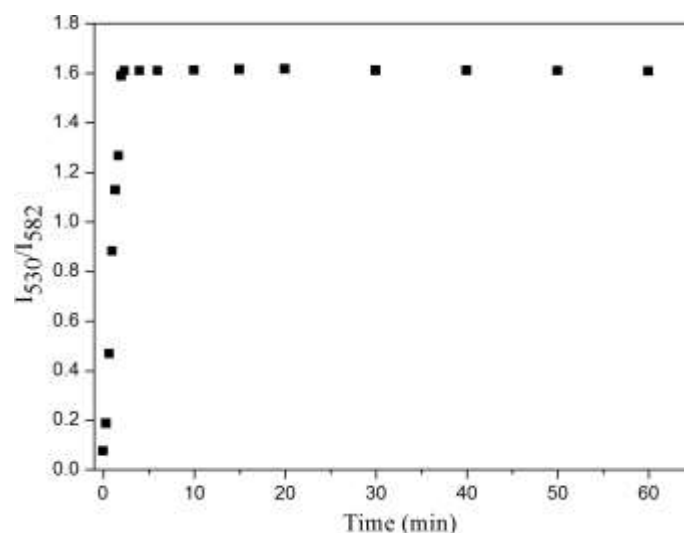

Fig. S1 Time-dependent fluorescence response of HCy-D (5  $\mu$ M) to 6 equiv. of NaHSO<sub>3</sub> in PBS (pH = 7.4, 10 mM, containing 30% DMF).  $\lambda_{\text{ex}}$  = 410 nm, slit: 10 nm/12 nm.

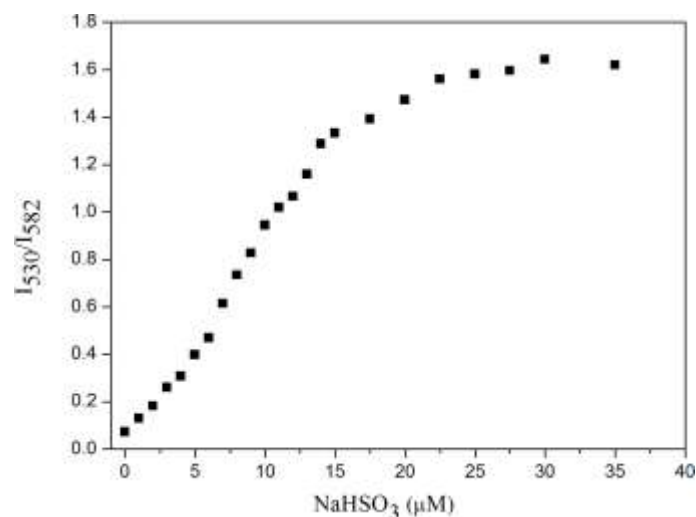

Fig. S2 Ratio ( $I_{530}/I_{582}$ ) changes upon addition of  $\text{NaHSO}_3$  (0-35  $\mu\text{M}$ ) in PBS (pH = 7.4, 10 mM, containing 30% DMF).  $[\text{HCy-D}] = 5 \mu\text{M}$ ,  $\lambda_{\text{ex}} = 410 \text{ nm}$ , slit: 10 nm/12 nm.

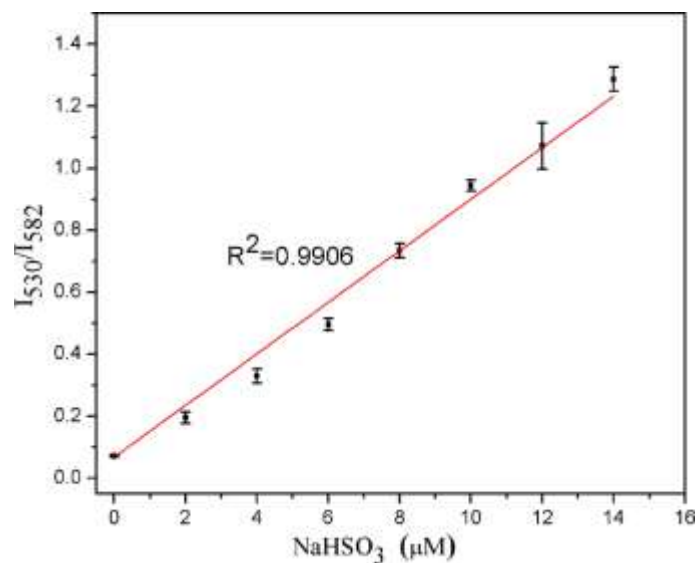

Fig. S3 The linear relationship between  $I_{530}/I_{582}$  and concentration of  $\text{NaHSO}_3$  (0-15  $\mu\text{M}$ ).

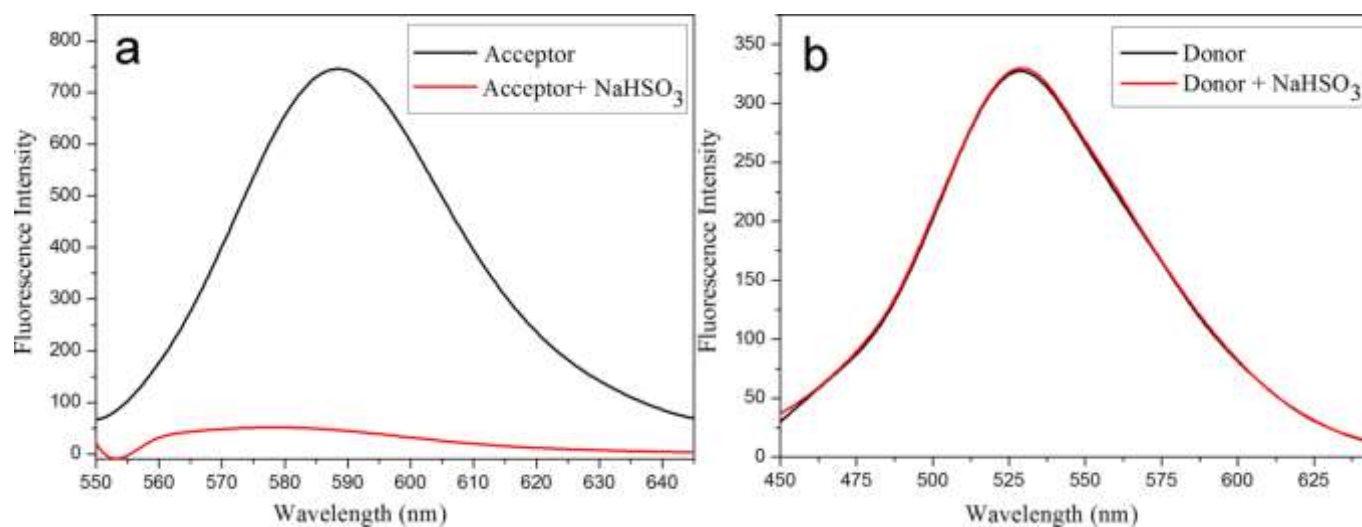

Fig. S4 Fluorescence emission of (a) Acceptor and (b) Donor in the absence and presence of 20 equiv. of  $\text{NaHSO}_3$  in PBS (pH = 7.4, 10 mM, containing 30% DMF).  $\lambda_{\text{ex}} = 410 \text{ nm}$  for the Donor and  $\lambda_{\text{ex}} = 530 \text{ nm}$  for the Acceptor, slit: 10 nm/12 nm.

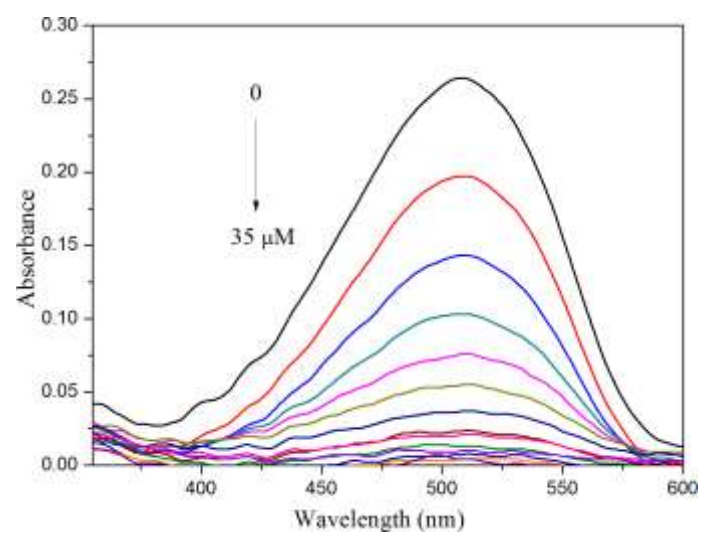

Fig. S5 UV-vis absorption spectra of HCy-D (5  $\mu\text{M}$ ) in the presence of different amounts of NaHSO<sub>3</sub> (0-35  $\mu\text{M}$ ) in PBS (pH = 7.4, 10 mM, containing 30% DMF).

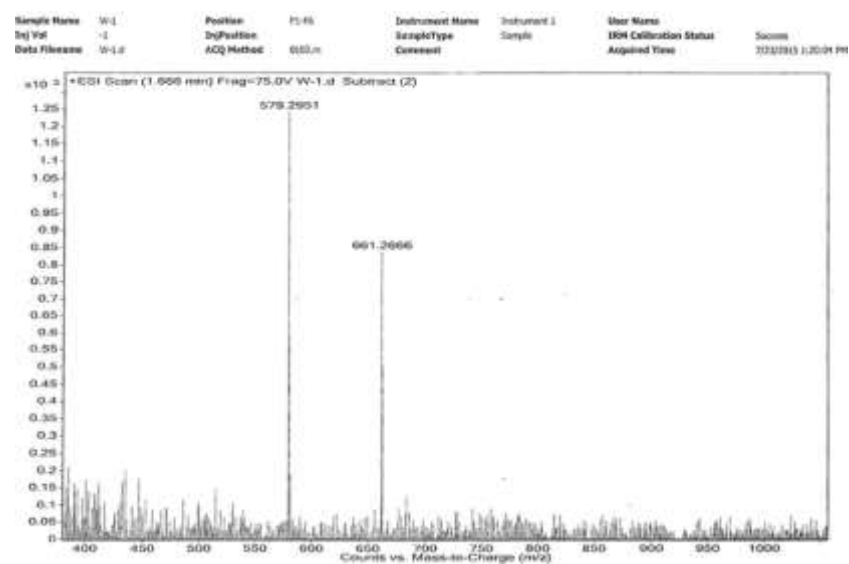

Fig. S6 HRMS spectrum of HCy-D in the presence of 6 equiv. of NaHSO<sub>3</sub> in DMSO/H<sub>2</sub>O (4:1).

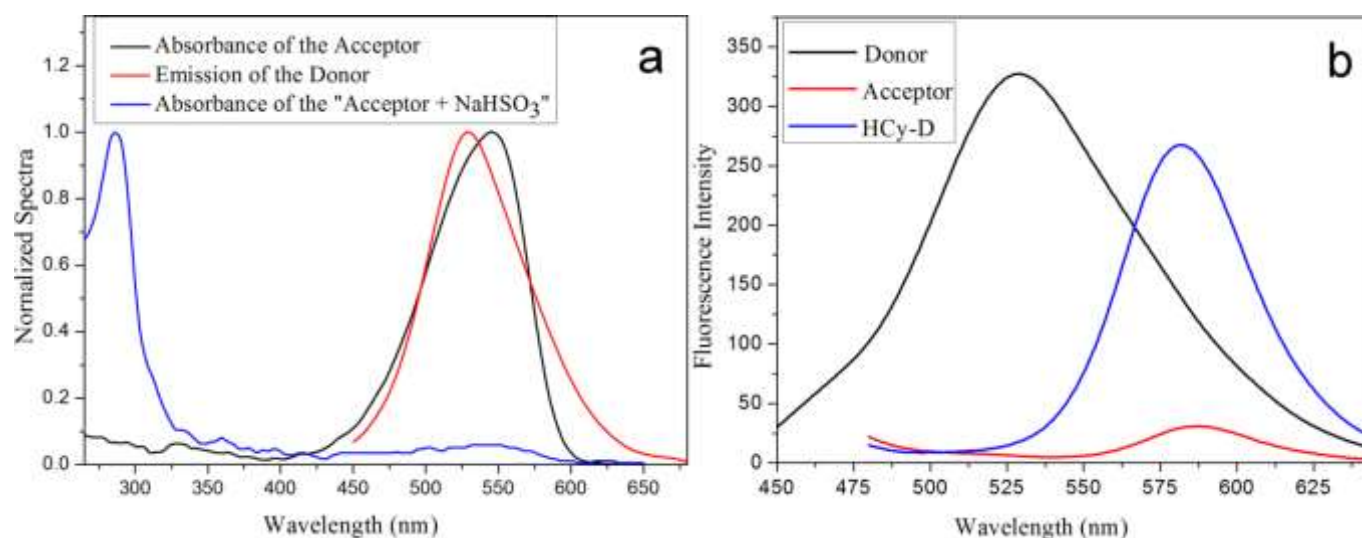

Fig. S7 (a) Normalized fluorescence emission spectrum of the Donor, and normalized UV-vis absorption spectrum of the Acceptor before and after addition of 20 equiv. of  $\text{NaHSO}_3$ . (b) The fluorescence emission of Donor, Acceptor and HCy-D in PBS (pH = 7.4, 10 mM, containing 30% DMF).  $\lambda_{\text{ex}}$  = 410 nm, slit: 10 nm/12 nm. [Donor] = [Acceptor] = [HCy-D] = 5  $\mu\text{M}$ .

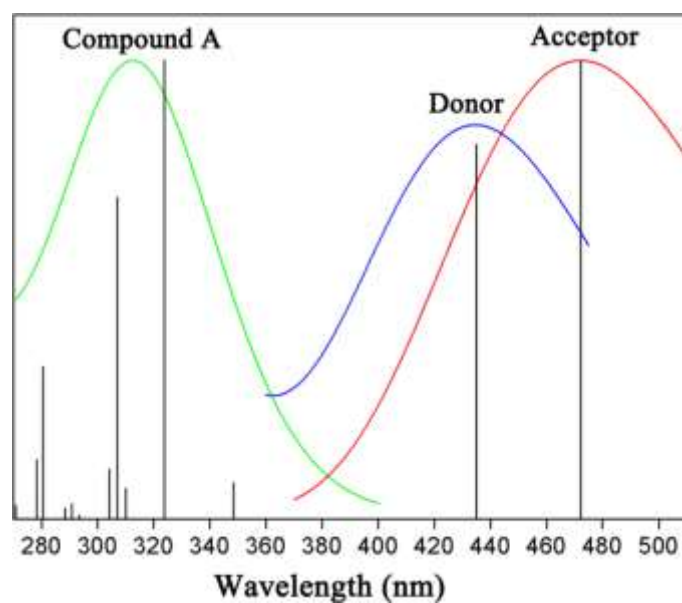

Fig. S8 Calculated absorption band of the Acceptor and Compound A, and calculated fluorescence emission band of the Donor.

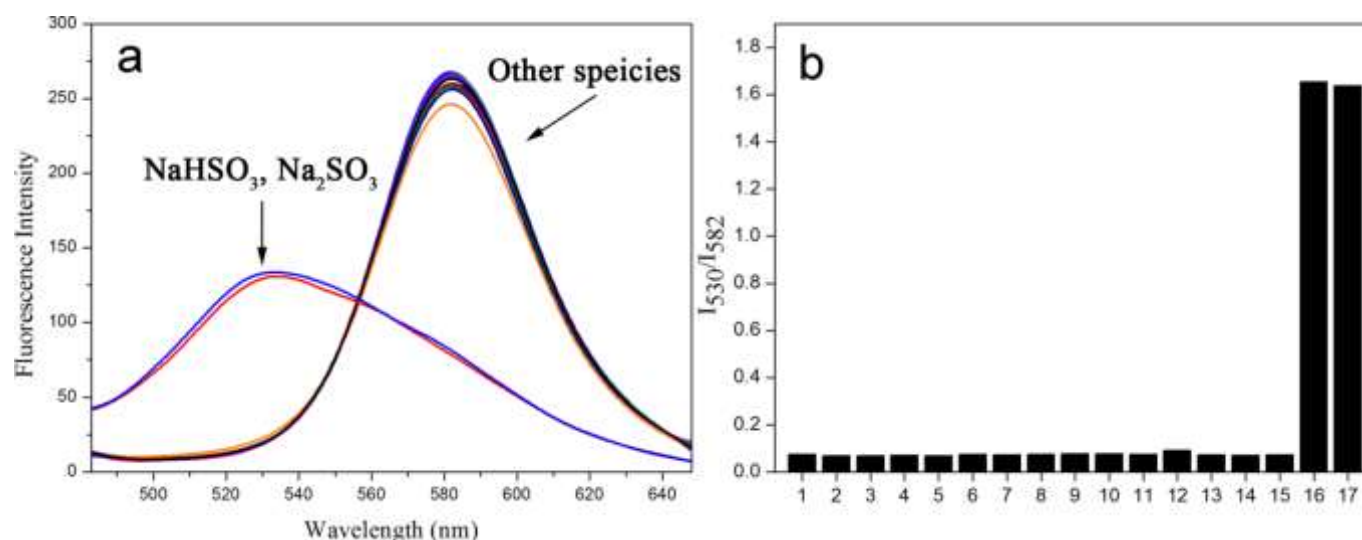

Fig. S9 (a) Fluorescence response of HCy-D (5  $\mu$ M) to various anions in PBS (pH = 7.4, 10 mM, containing 30% DMF). 1. vacant; 2. F<sup>-</sup>; 3. Cl<sup>-</sup>; 4. Br<sup>-</sup>; 5. I<sup>-</sup>; 6. HCO<sub>3</sub><sup>-</sup>; 7. NO<sub>3</sub><sup>-</sup>; 8. ClO<sup>-</sup>; 9. SO<sub>4</sub><sup>2-</sup>; 10. SCN<sup>-</sup>; 11. S<sub>2</sub>O<sub>3</sub><sup>2-</sup>; 12. S<sup>2-</sup>; 13. Cys; 14. Hcy; 15. GSH; 16. HSO<sub>3</sub><sup>-</sup>; 17. SO<sub>3</sub><sup>2-</sup>. Final concentration for all the species was 50  $\mu$ M except for 13-15 (1 mM) and 16-17 (30  $\mu$ M).  $\lambda_{ex}$  = 410 nm, slit: 10 nm/12 nm. (b) Response ( $I_{530}/I_{582}$ ) of HCy-D (5  $\mu$ M) to various anions in PBS (pH = 7.4, 10 mM, containing 30% DMF). 1. vacant; 2. F<sup>-</sup>; 3. Cl<sup>-</sup>; 4. Br<sup>-</sup>; 5. I<sup>-</sup>; 6. HCO<sub>3</sub><sup>-</sup>; 7. NO<sub>3</sub><sup>-</sup>; 8. ClO<sup>-</sup>; 9. SO<sub>4</sub><sup>2-</sup>; 10. SCN<sup>-</sup>; 11. S<sub>2</sub>O<sub>3</sub><sup>2-</sup>; 12. S<sup>2-</sup>; 13. Cys; 14. Hcy; 15. GSH; 16. HSO<sub>3</sub><sup>-</sup>; 17. SO<sub>3</sub><sup>2-</sup>. Final concentration for all the species was 50  $\mu$ M except for 13-15 (1 mM) and 16-17 (30  $\mu$ M).

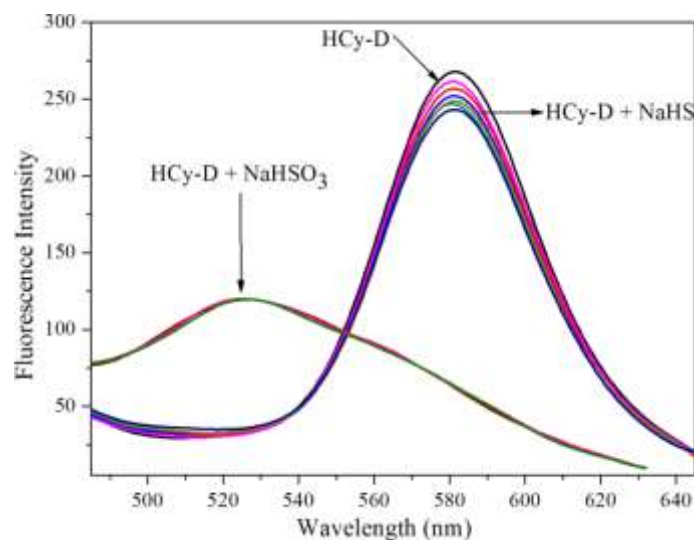

Fig. S10 Fluorescence response of HCy-D (5  $\mu$ M) to NaHSO<sub>3</sub> (50  $\mu$ M) and NaHS (50  $\mu$ M, 100  $\mu$ M) in PBS (pH = 7.4, 10 mM, containing 30% DMF). Data were acquired at 10, 20 and 30 min after NaHSO<sub>3</sub> (50  $\mu$ M) or NaHS (50  $\mu$ M, 100  $\mu$ M) was added.  $\lambda_{ex}$  = 410 nm, slit: 10 nm/12 nm.

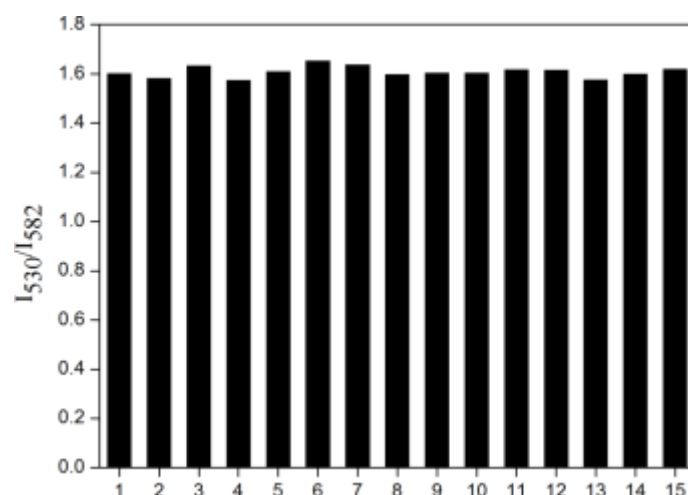

Fig. S11 Response ( $I_{530}/I_{582}$ ) of HCy-D (5  $\mu$ M) to  $NaHSO_3$  (30  $\mu$ M) in the presence of various anions in PBS (pH = 7.4, 10 mM, containing 30% DMF). 1. vacant; 2.  $F^-$ ; 3.  $Cl^-$ ; 4.  $Br^-$ ; 5.  $I^-$ ; 6.  $HCO_3^-$ ; 7.  $NO_3^-$ ; 8.  $ClO^-$ ; 9.  $SO_4^{2-}$ ; 10.  $SCN^-$ ; 11.  $S_2O_3^{2-}$ ; 12.  $S^{2-}$ ; 13. Cys; 14. Hcy; 15. GSH. Final concentration for all the potential competitive species was 50  $\mu$ M except for 13-15 (1 mM).

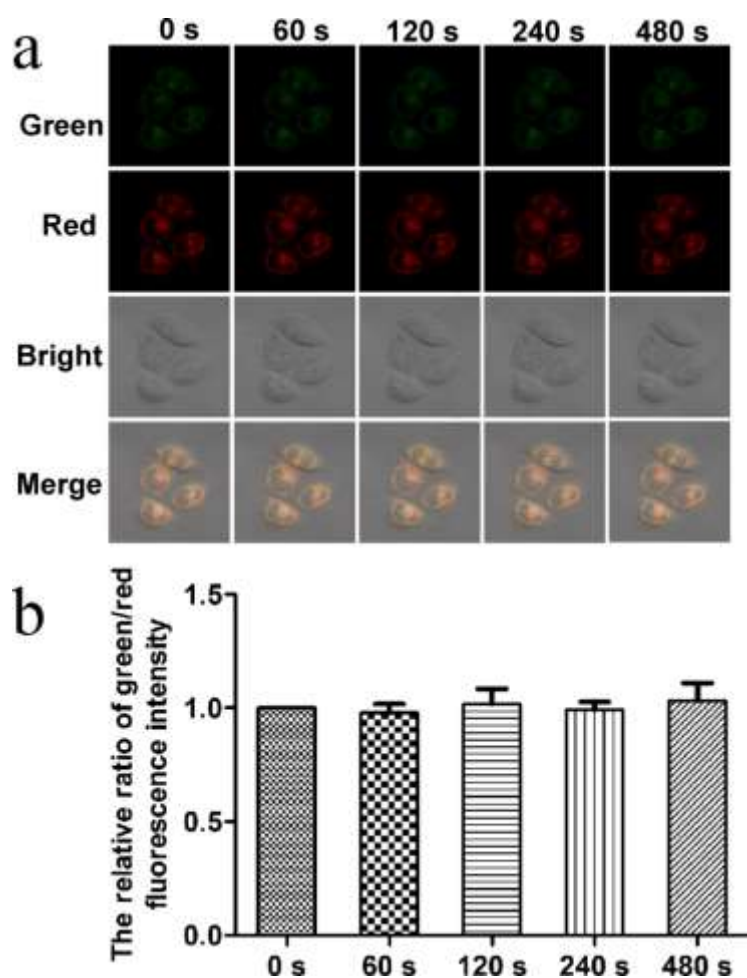

Fig. S12 (a) Photostability of HCy-D for fluorescence images of HeLa cells. The cells were incubated with HCy-D (1  $\mu$ M) for 1 h beforehand. First line: fluorescence images from the green channel (405-555 nm); second line: fluorescence images at the red channel (560-615 nm); third line: bright field images; fourth line: overlay images of

the first, second and third lines.  $\lambda_{\text{ex}} = 405 \text{ nm}$ . (b) The relative ratio of green/red fluorescence intensity in correspondence with (a).

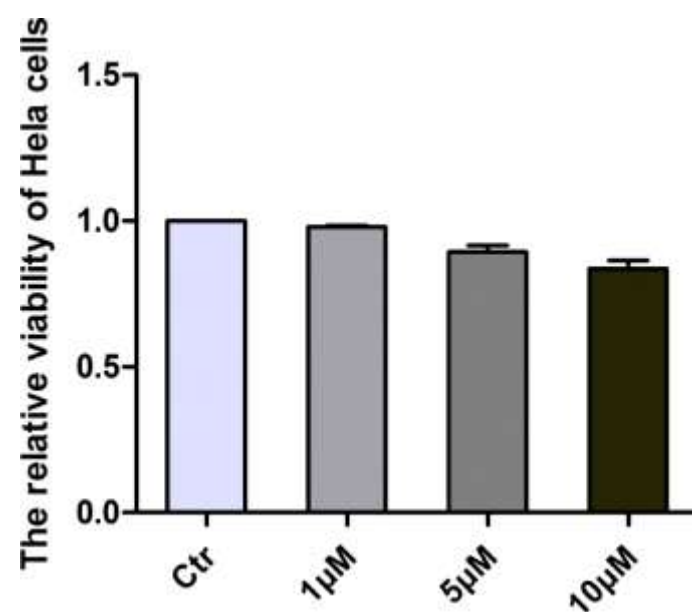

Fig. S13 .Cell viability by a standard SRB assay. HeLa cells were incubated with HCy-D (1, 5 and 10  $\mu\text{M}$ ) for 6 h.



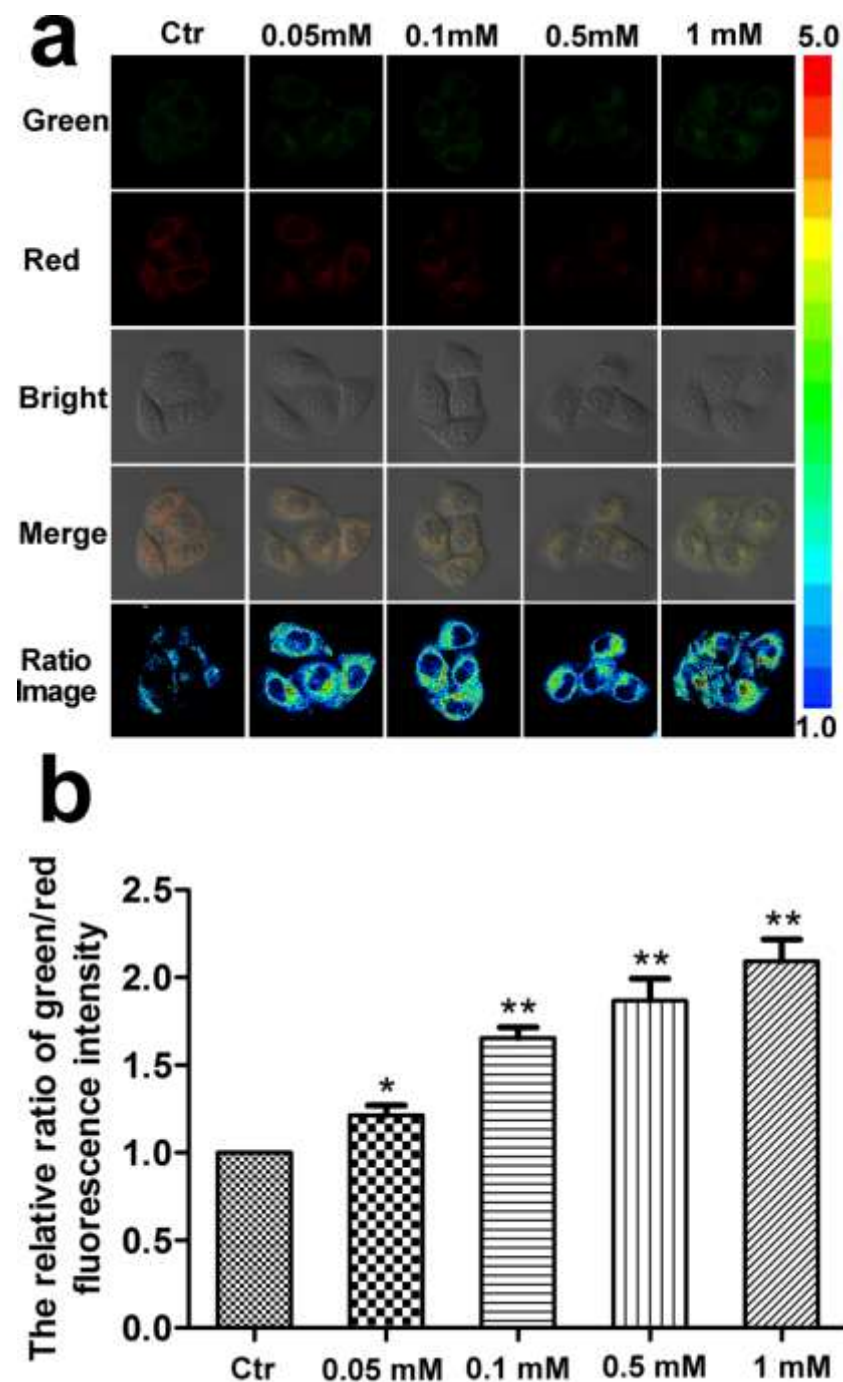

Fig. S14 (a) Fluorescence and bright field images of HeLa cells incubated with HCy-D (1  $\mu$ M) for 1 h, then with NaHSO<sub>3</sub> (0, 0.05, 0.1, 0.5, 1 mM) for another 0.5 h. (b) The relative ratio of green/red fluorescence intensity. The ratio images were all obtained as  $F_{\text{green}}/F_{\text{red}}$ . Images were acquired from 405-555 nm for green fluorescence, and from 560-700 nm for red fluorescence.  $\lambda_{\text{ex}} = 405$  nm.



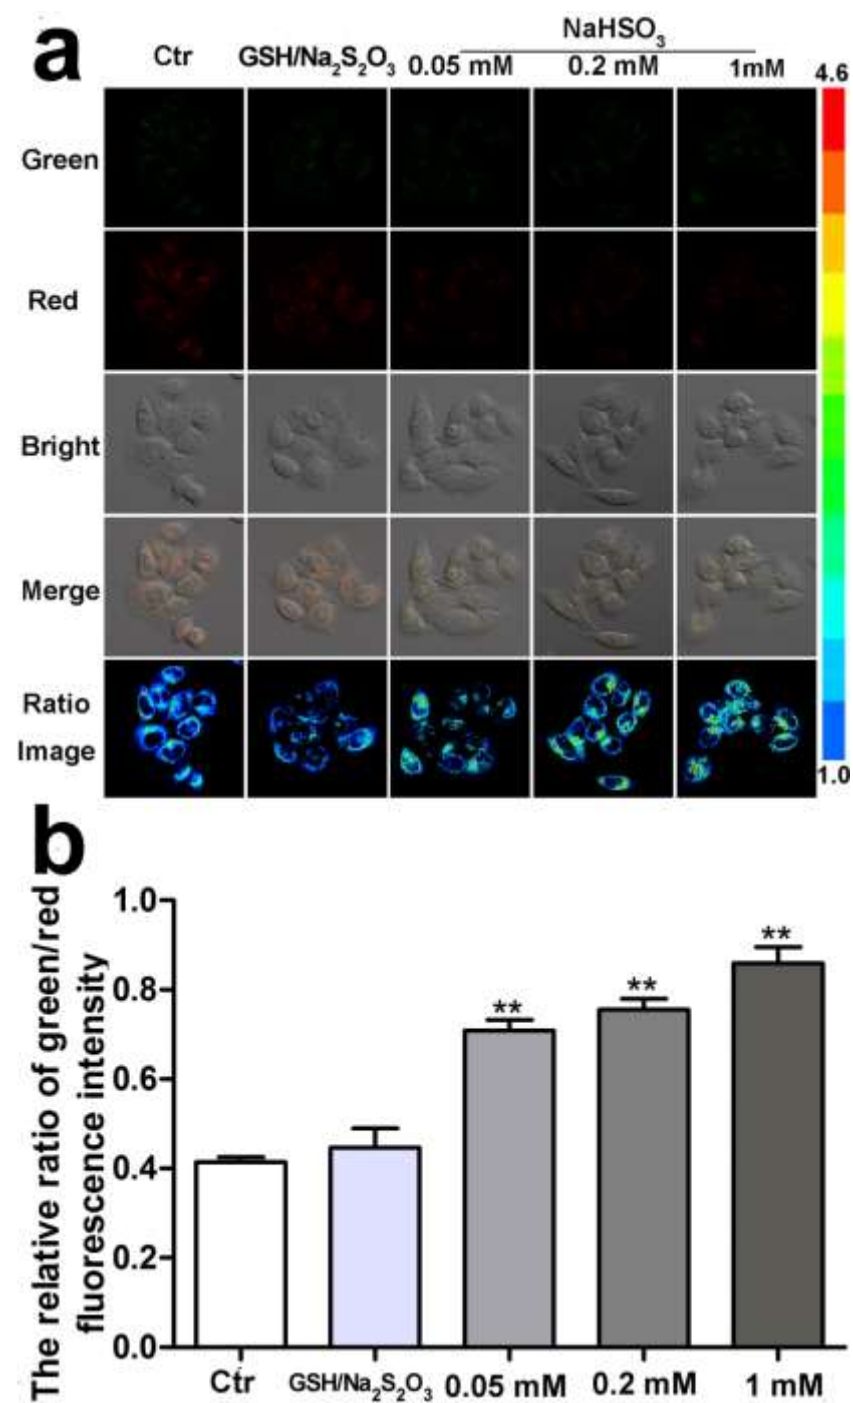

Fig. S15 (a) The first row (vertically): L-02 cells were incubated with HCy-D (1  $\mu$ M) for 1 h; The second row: L-02 cells were incubated with HCy-D (1  $\mu$ M) for 1 h, and then were incubated with 500  $\mu$ M GSH and 250  $\mu$ M Na<sub>2</sub>S<sub>2</sub>O<sub>3</sub> for another 0.5 h; The 3-5 row: L-02 cells were incubated with HCy-D (1  $\mu$ M) for 1 h, and then with 0.05, 0.2 and 1 mM NaHSO<sub>3</sub> for another 0.5 h, respectively. (b) The relative ratio of green/red fluorescence intensity of row 1-5 in (a). The ratio images were all obtained as  $F_{\text{green}}/F_{\text{red}}$ . Images were acquired from 405-555 nm for green fluorescence, and from 560-700 nm for red fluorescence.  $\lambda_{\text{ex}} = 405$  nm.



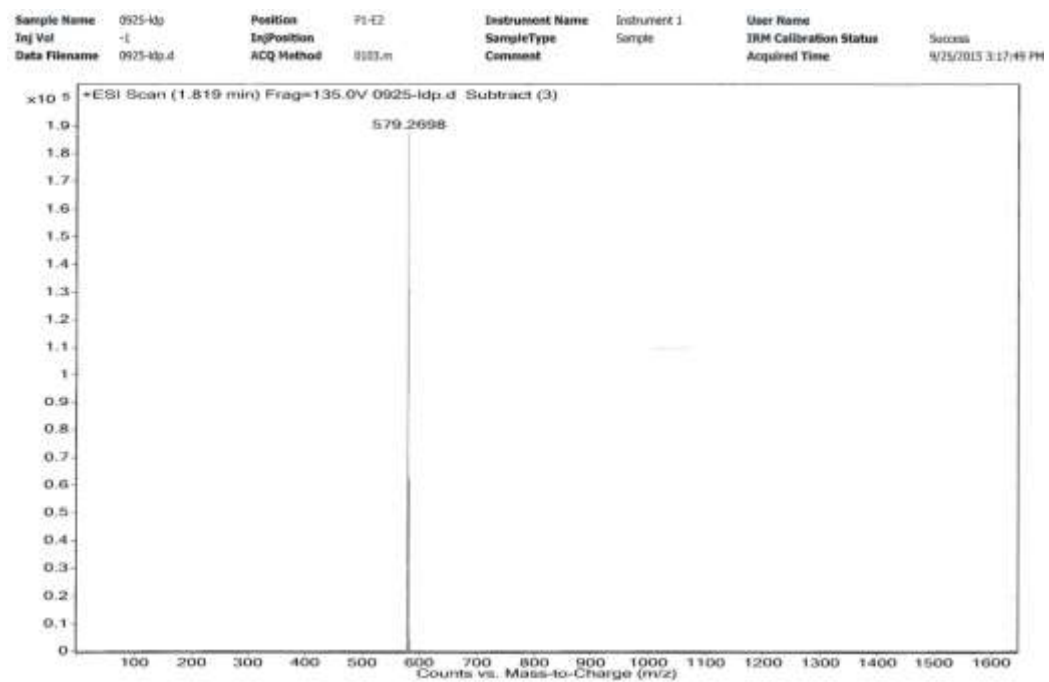

Fig. S18 HRMS spectrum of probe HCy-D.

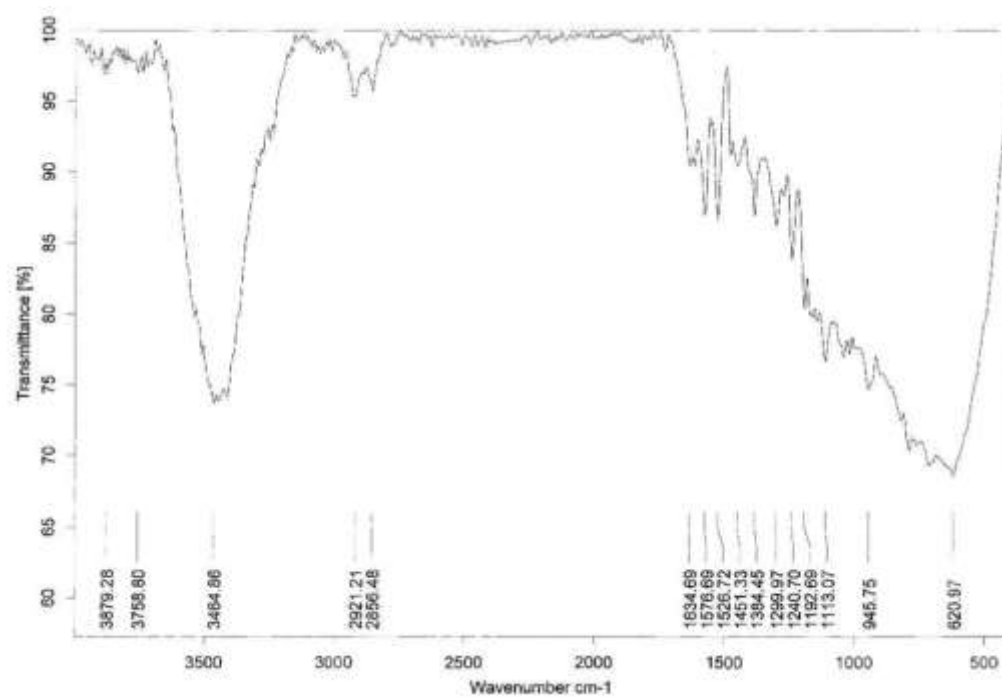

Fig. S19 FT-IR spectrum of probe HCy-D.



| Sample Name   | Unavailable       | Position    | Unavailable | Instrument Name | Unavailable                       | User Name              | Unavailable |
|---------------|-------------------|-------------|-------------|-----------------|-----------------------------------|------------------------|-------------|
| Inj Vol       | Unavailable       | InjPosition | Unavailable | SampleType      | Unavailable                       | IRM Calibration Status | Success     |
| Data Filename | 0922-CH2-1-19-7.d | ACQ Method  | Unavailable | Comment         | Sample information is unavailable | Acquired Time          | Unavailable |

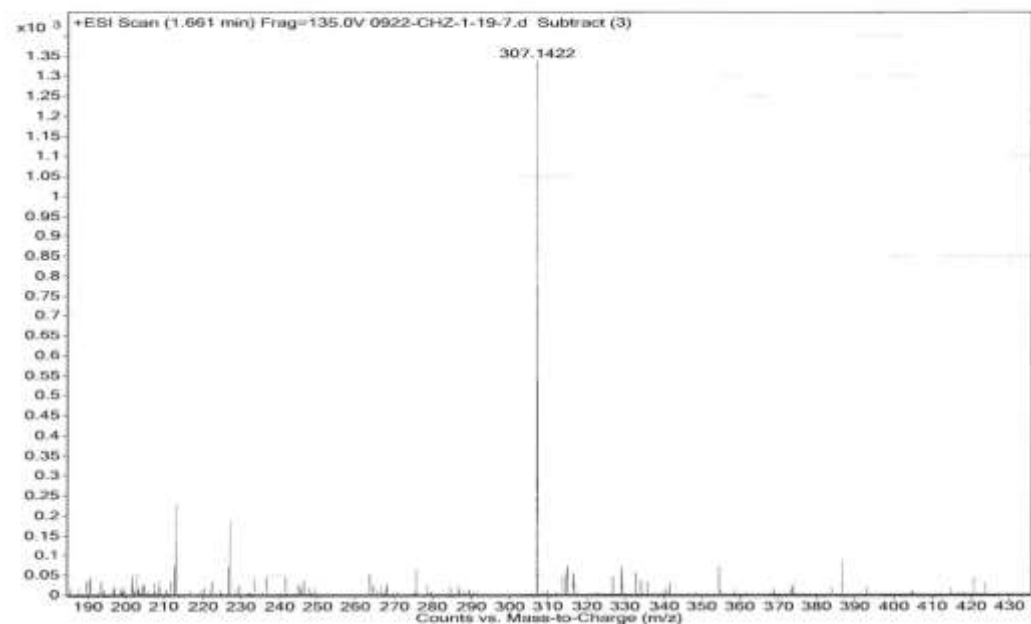

Fig. S22 HRMS spectrum of Donor.

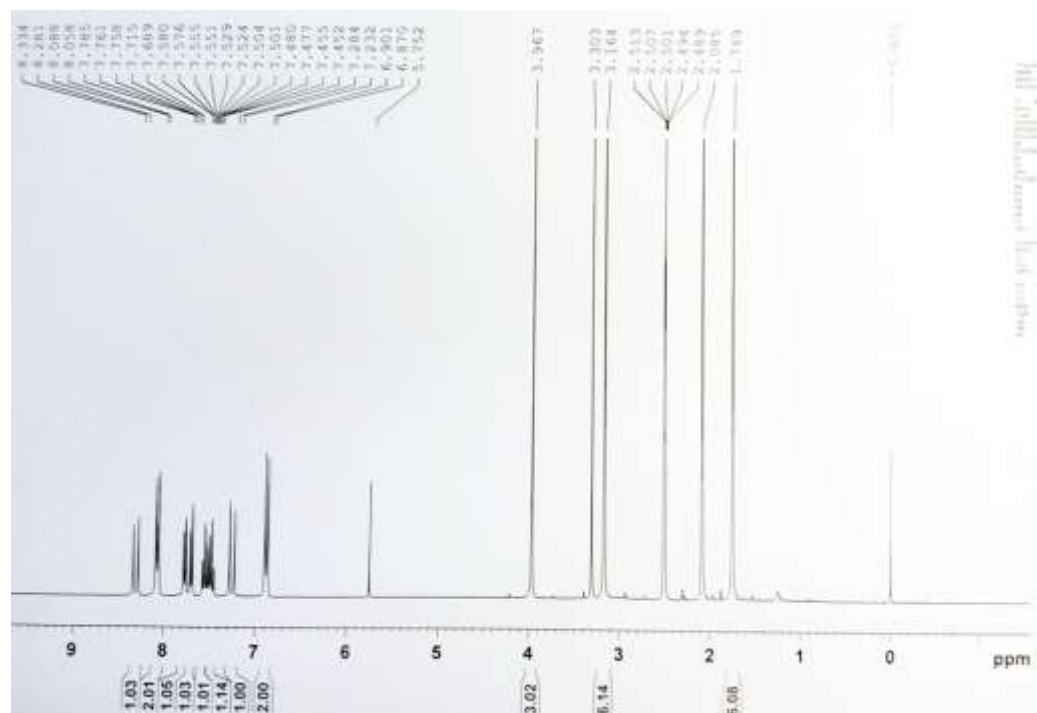

Fig. S23 <sup>1</sup>H NMR spectrum of Acceptor in DMSO-*d*<sub>6</sub>.

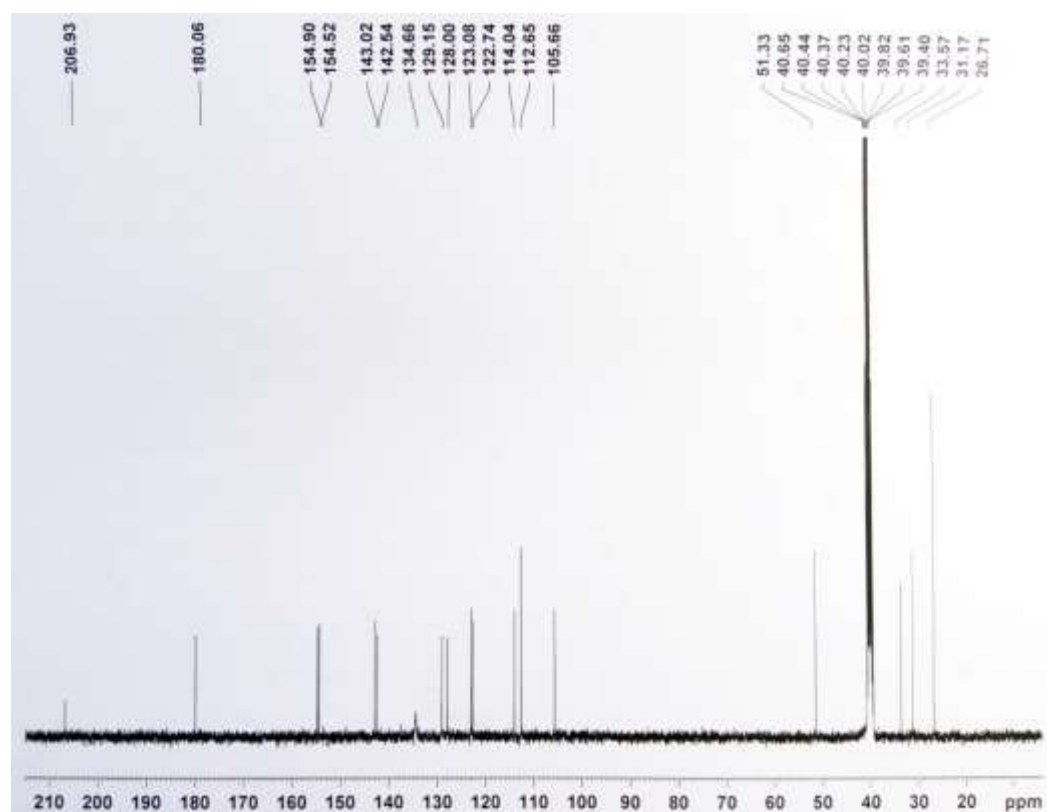

Fig. S24  $^{13}\text{C}$  NMR spectrum of Acceptor in  $\text{DMSO-}d_6$ .

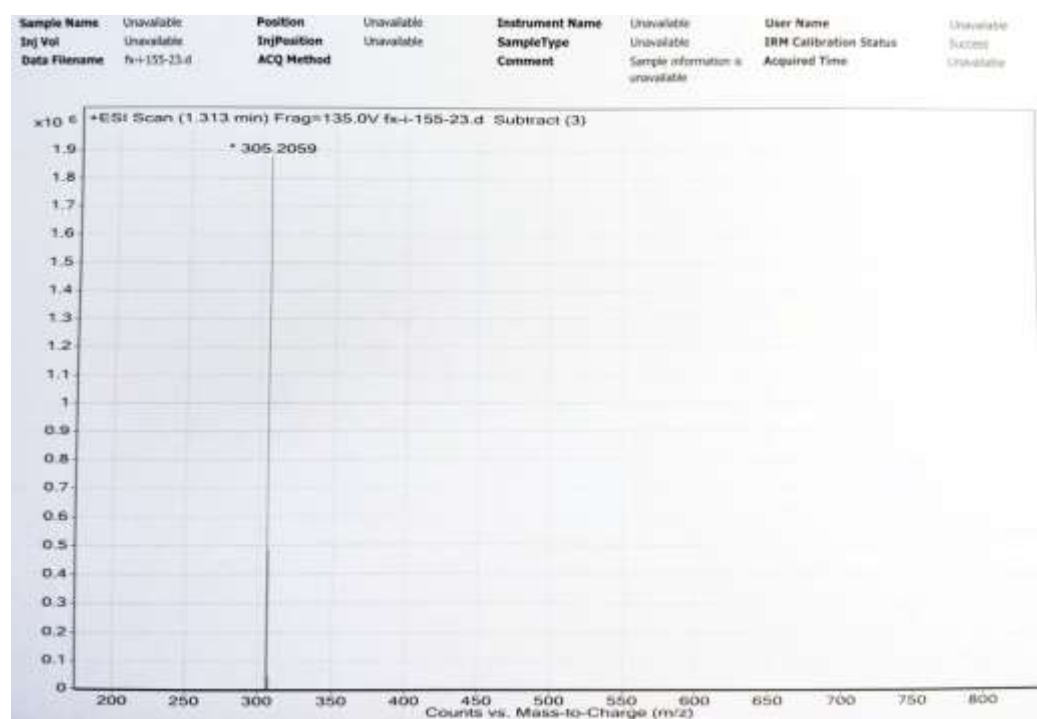

Fig. S25 HRMS spectrum of Acceptor.
